# Supplementary material for: STM observation of 1,3,5-triazines bearing rod-like benzeneazonaphthalene moieties monolayers self-assembled on graphite surfaceElectronic supplementary information (ESI) available: experimental details for the preparation of compounds 2–4, mass and IR spectra of 3a–c and 4a–c, and 1H NMR spectra of 4a–c. See http://www.rsc.org/suppdata/jm/b2/b200043c/
Source: Royal Society of Chemistry journal article supplement (doi:10.1039/b200043c), 2002-03-14

30-10-18

# IR spectrum of 4a

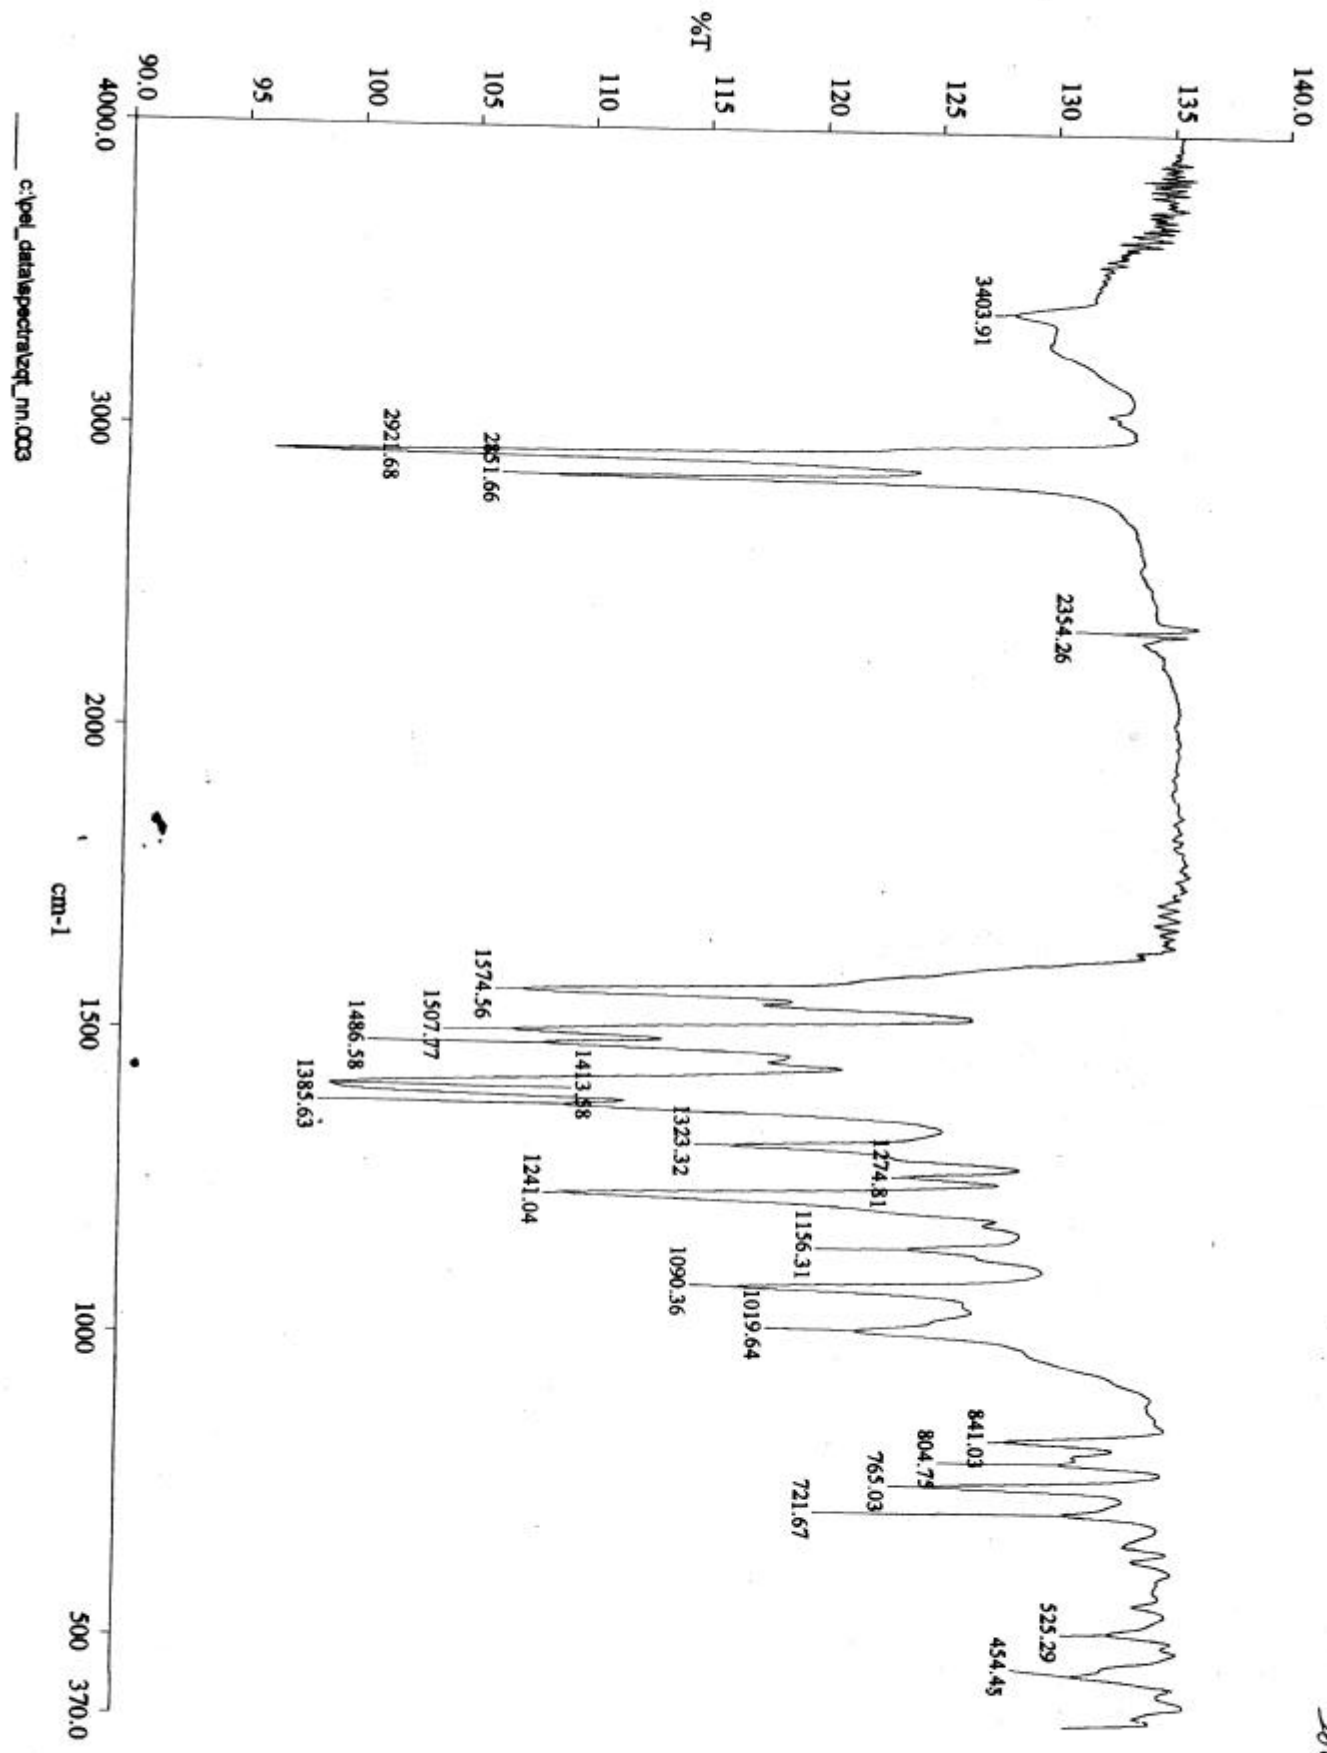

18

ZRT NN  
2001.4.4

# 1H NMR of 4a

18N=N

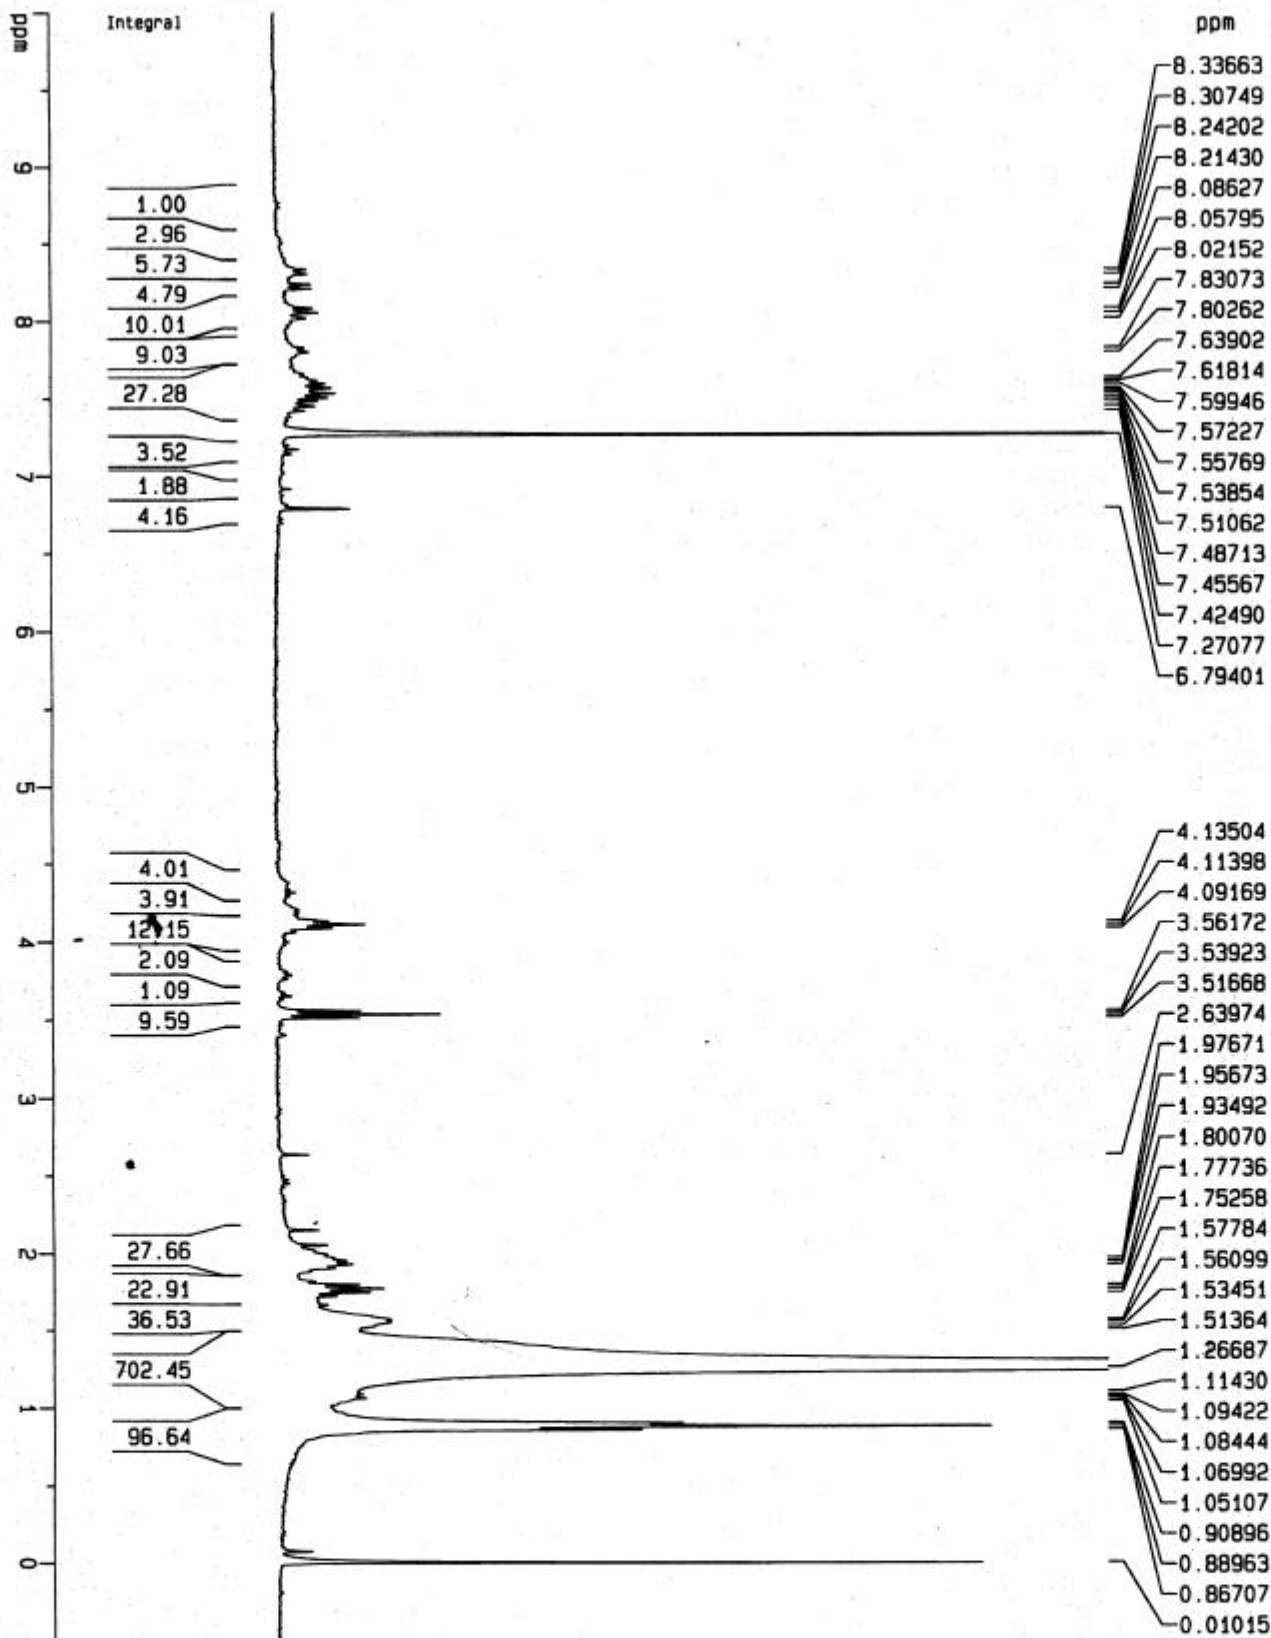

Current Data Parameters  
 NAME hou-1H  
 EXPNO 21  
 PROCNO 1

F2 - Acquisition Parameters  
 Date\_ 20010521  
 Time 9.47  
 INSTRUM dmx300  
 PROBHD BBI

PULPROG zg  
 TD 12048  
 SOLVENT CDCl3  
 NS 8  
 DS 0  
 SMH 5122.951 Hz  
 FIDRES 0.425212 Hz  
 AQ 1.1759348 sec  
 RG 256  
 DM 97.600 usec  
 DE 4.50 usec  
 TE 300.0 K  
 D1 3.00000000 sec  
 P1 5.50 usec  
 SF01 300.1319570 MHz  
 NUC1 1H  
 PL1 0.00 dB

F2 - Processing parameters  
 SI 8192  
 SF 300.1300061 MHz  
 MDW GM  
 SSB 0  
 LB -0.30 Hz  
 GB 0.1  
 PC 0.10

1D NMR plot parameters  
 CX 21.50 cm  
 F1P 10.000 ppm  
 F1 3001.30 Hz  
 F2P -0.500 ppm  
 F2 -150.07 Hz  
 PPMCM 0.48837 ppm/cm  
 HZCM 146.57512 Hz/cm

MS of 4a

MALDI-TOF, 18N2, CCA, 2001, 4, 6

a.i.

- 1143.34
- 1197.42
- 1247.40
- 1293.37
- 1321.38
- 1414.47
- 1518.44
- 1622.51
- 1644.55
- 1660.60

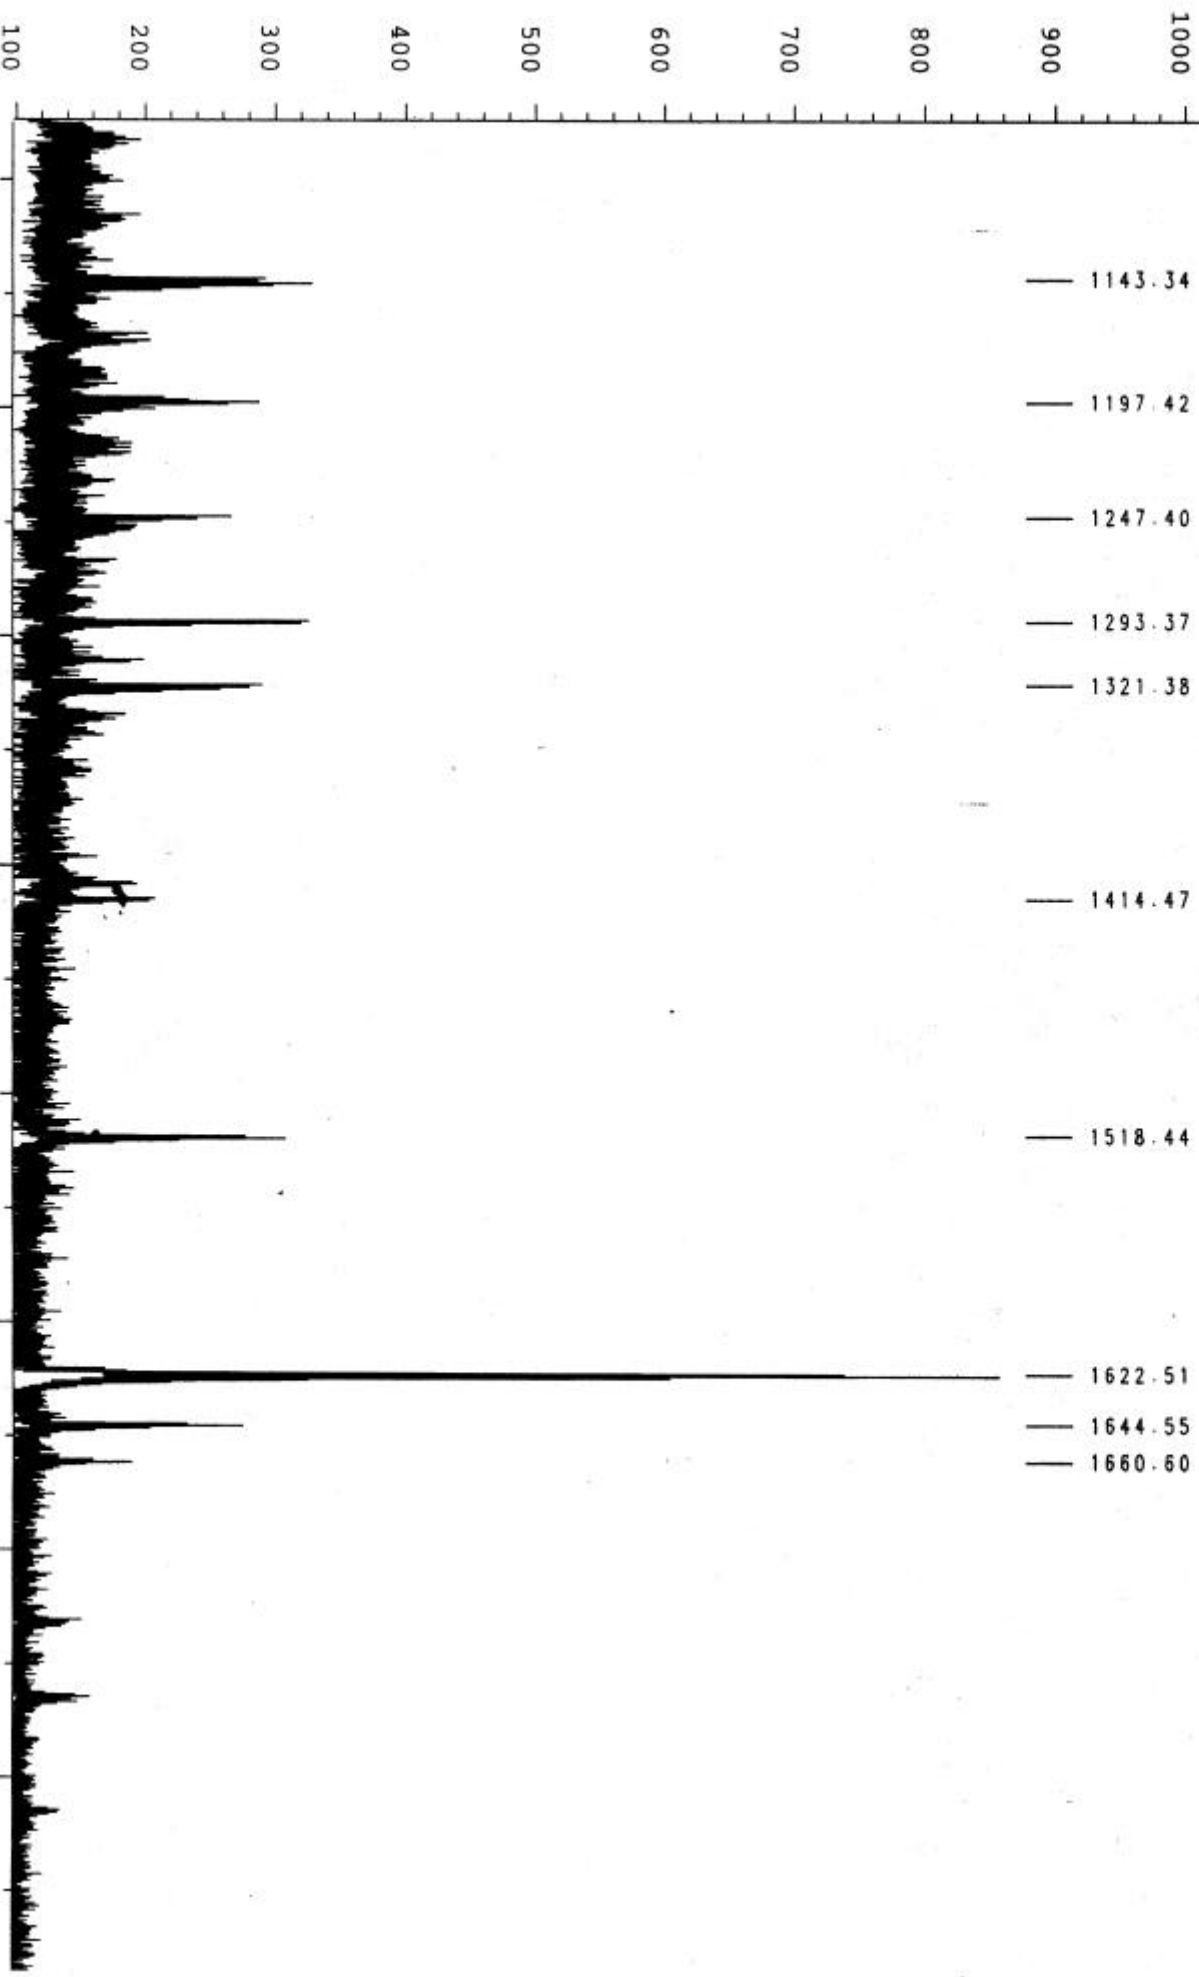

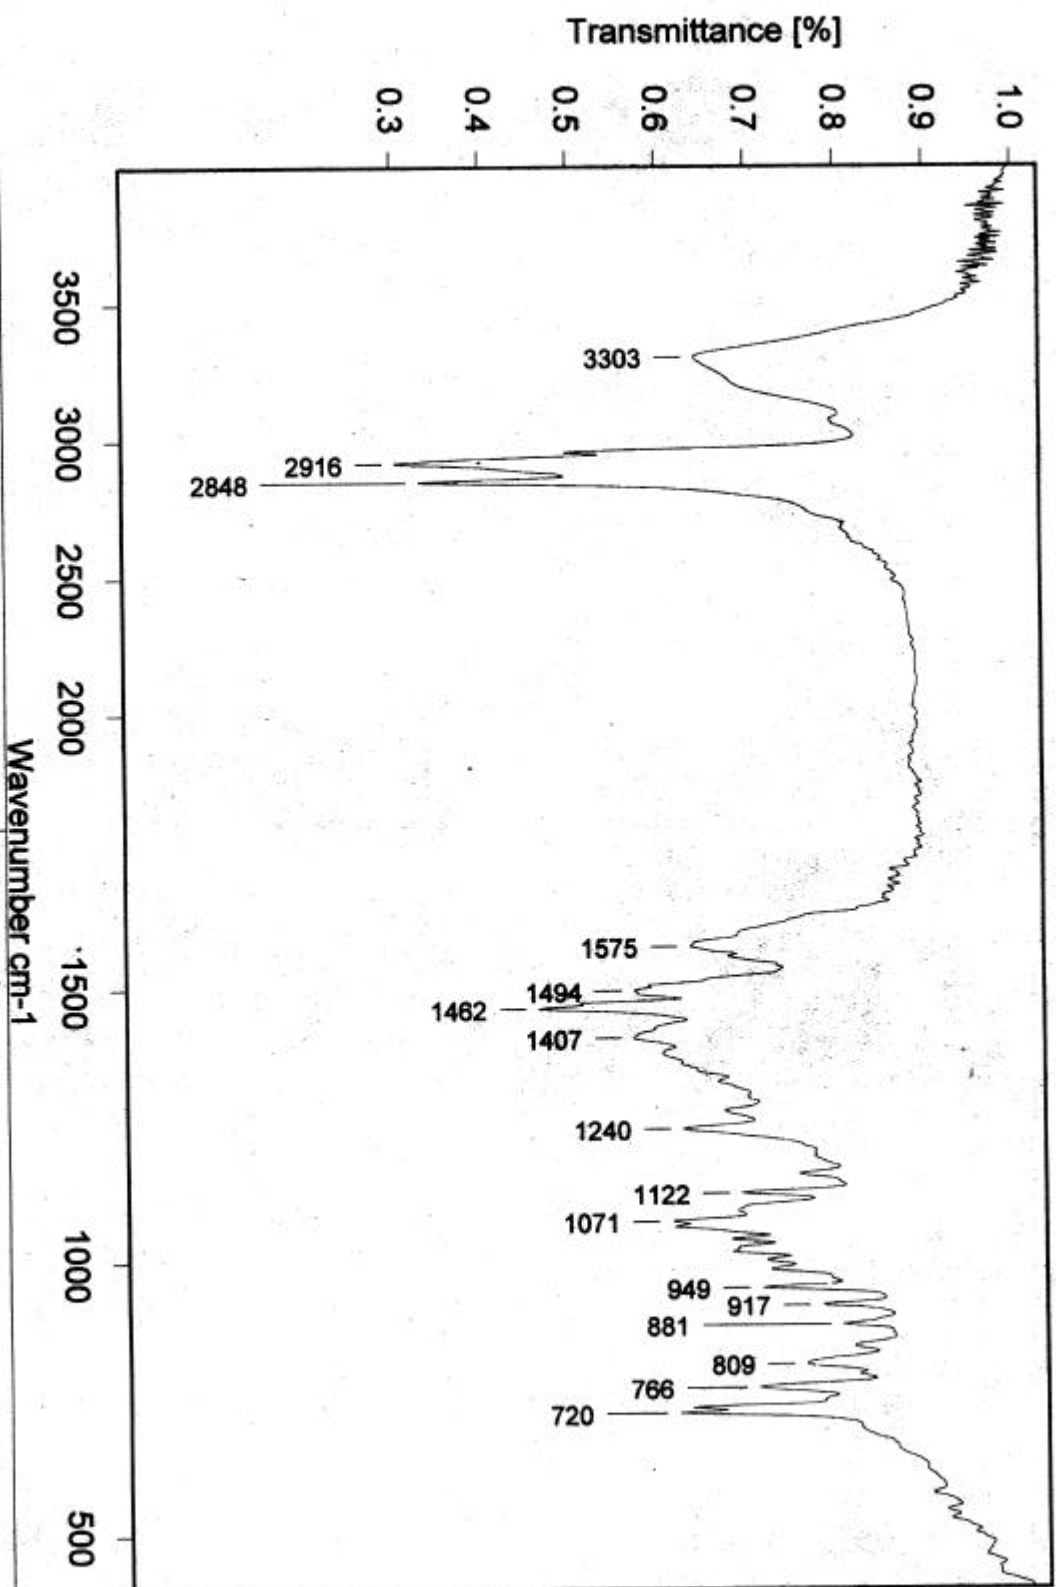

|                                |                              |
|--------------------------------|------------------------------|
| Path of File D:\data\test      | Filename 16N=N.1             |
| Sample Name                    | Sample Form                  |
| Date of Measurement 18/05/2001 | Time of Measurement 14:24:50 |
| Resolution 4                   | Signal Gain, Sample          |
| Number of Sample Scans 20      | Instrument Bruker EQUINOX55  |

# <sup>1</sup>H NMR of 4b

16N=N

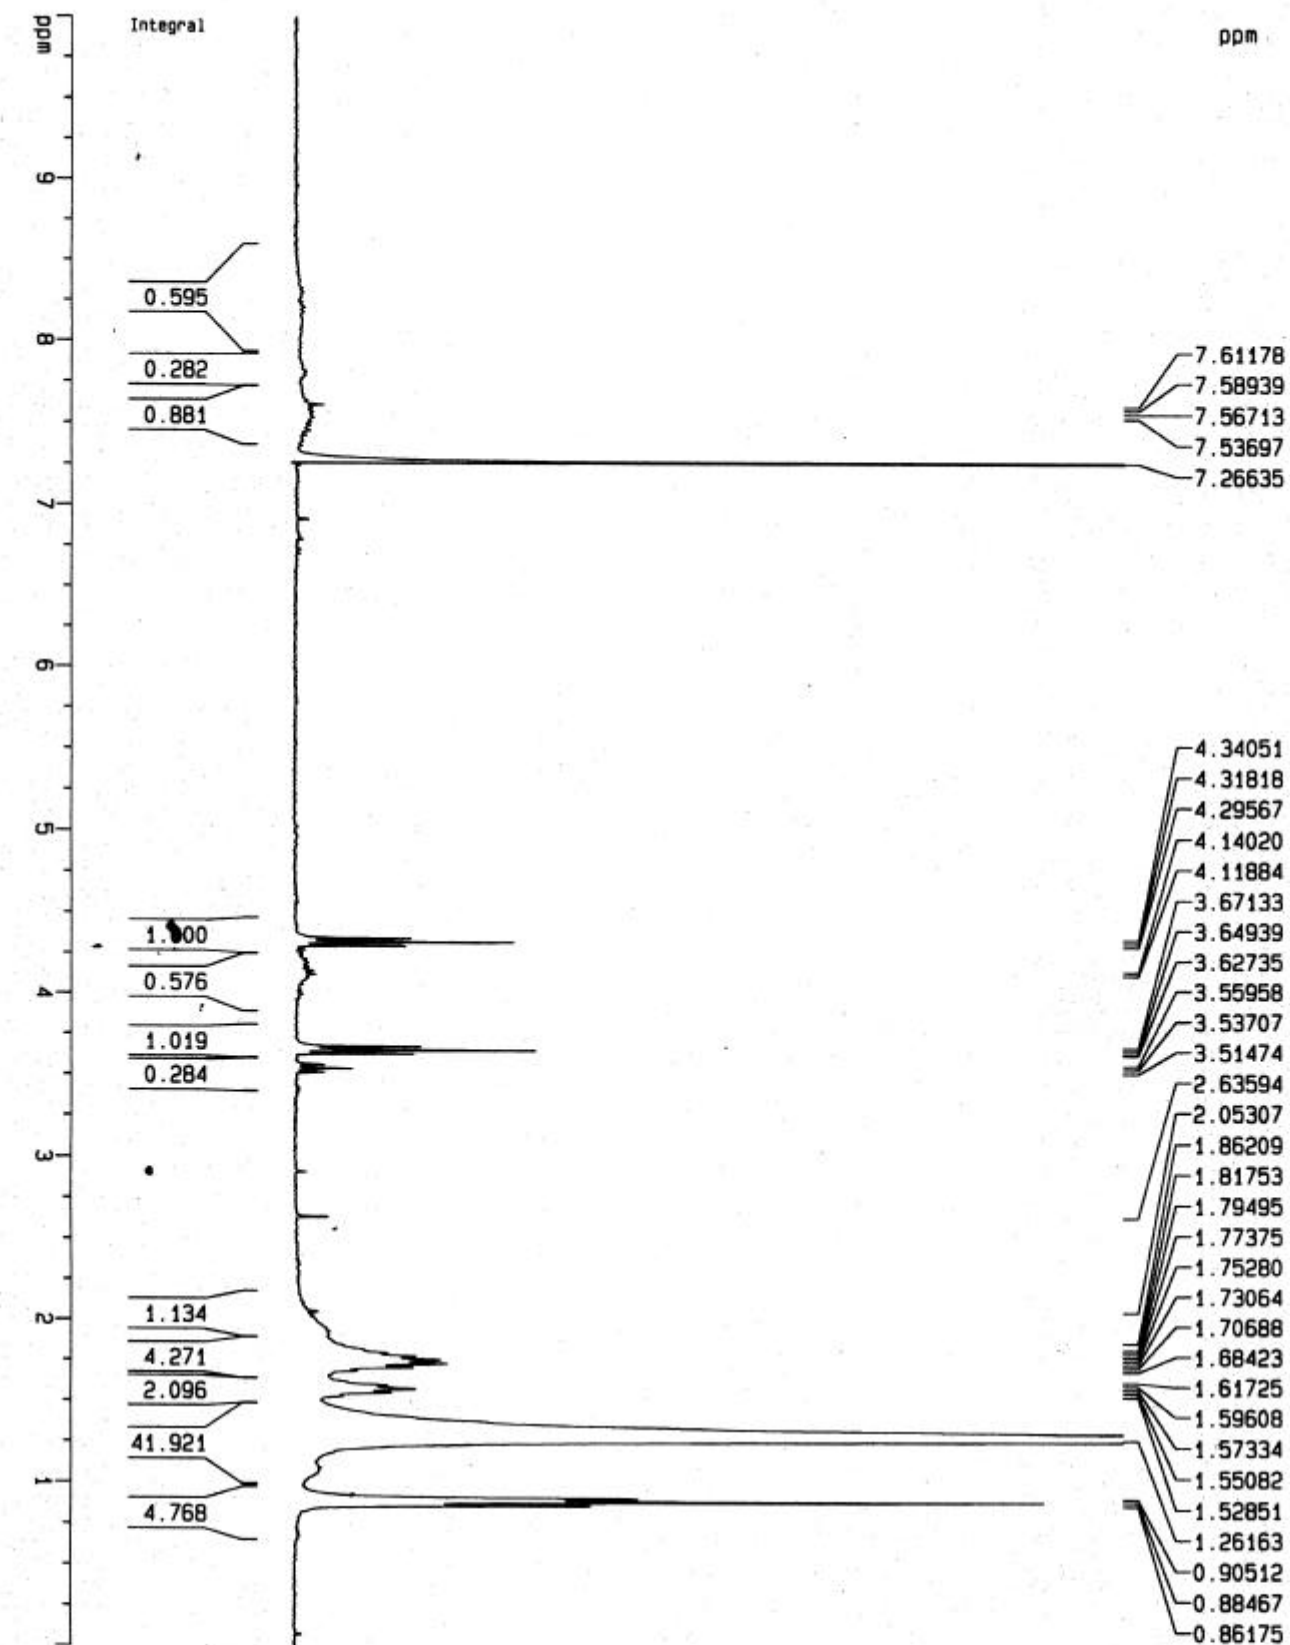

Current Data Parameters  
 NAME hou-1H  
 EXPNO 6  
 PROCNO 1

F2 - Acquisition Parameters  
 Date\_ 20010522  
 Time 2.09

INSTRUM dmX300  
 PROBHD BBI

PULPROG zg

TD 12048  
 SOLVENT CDCl3

NS 8  
 DS 0

SMH 6009.615 Hz  
 FIDRES 0.498806 Hz

AQ 1.0024436 sec  
 RG 256

DM 83.200 usec  
 DE 4.50 usec

TE 300.0 K

D1 3.0000000 sec  
 P1 5.50 usec

SFO1 300.1317272 MHz  
 NUC1 1H

PL1 0.00 dB

F2 - Processing parameters

SI 8192

SF 300.1300076 MHz

MDM GM  
 SSB 0

LB -0.30 Hz  
 GB 0.1

PC 0.10

1D NMR plot parameters

CX 21.50 cm

F1P 10.000 ppm  
 F1 3001.30 Hz  
 F2P 0.000 ppm  
 F2 0.00 Hz  
 PPMCM 0.46512 ppm/cm  
 HZCM 139.59535 Hz/cm

MALDI-TOF, CCA as matrix, 16N=N, 2001

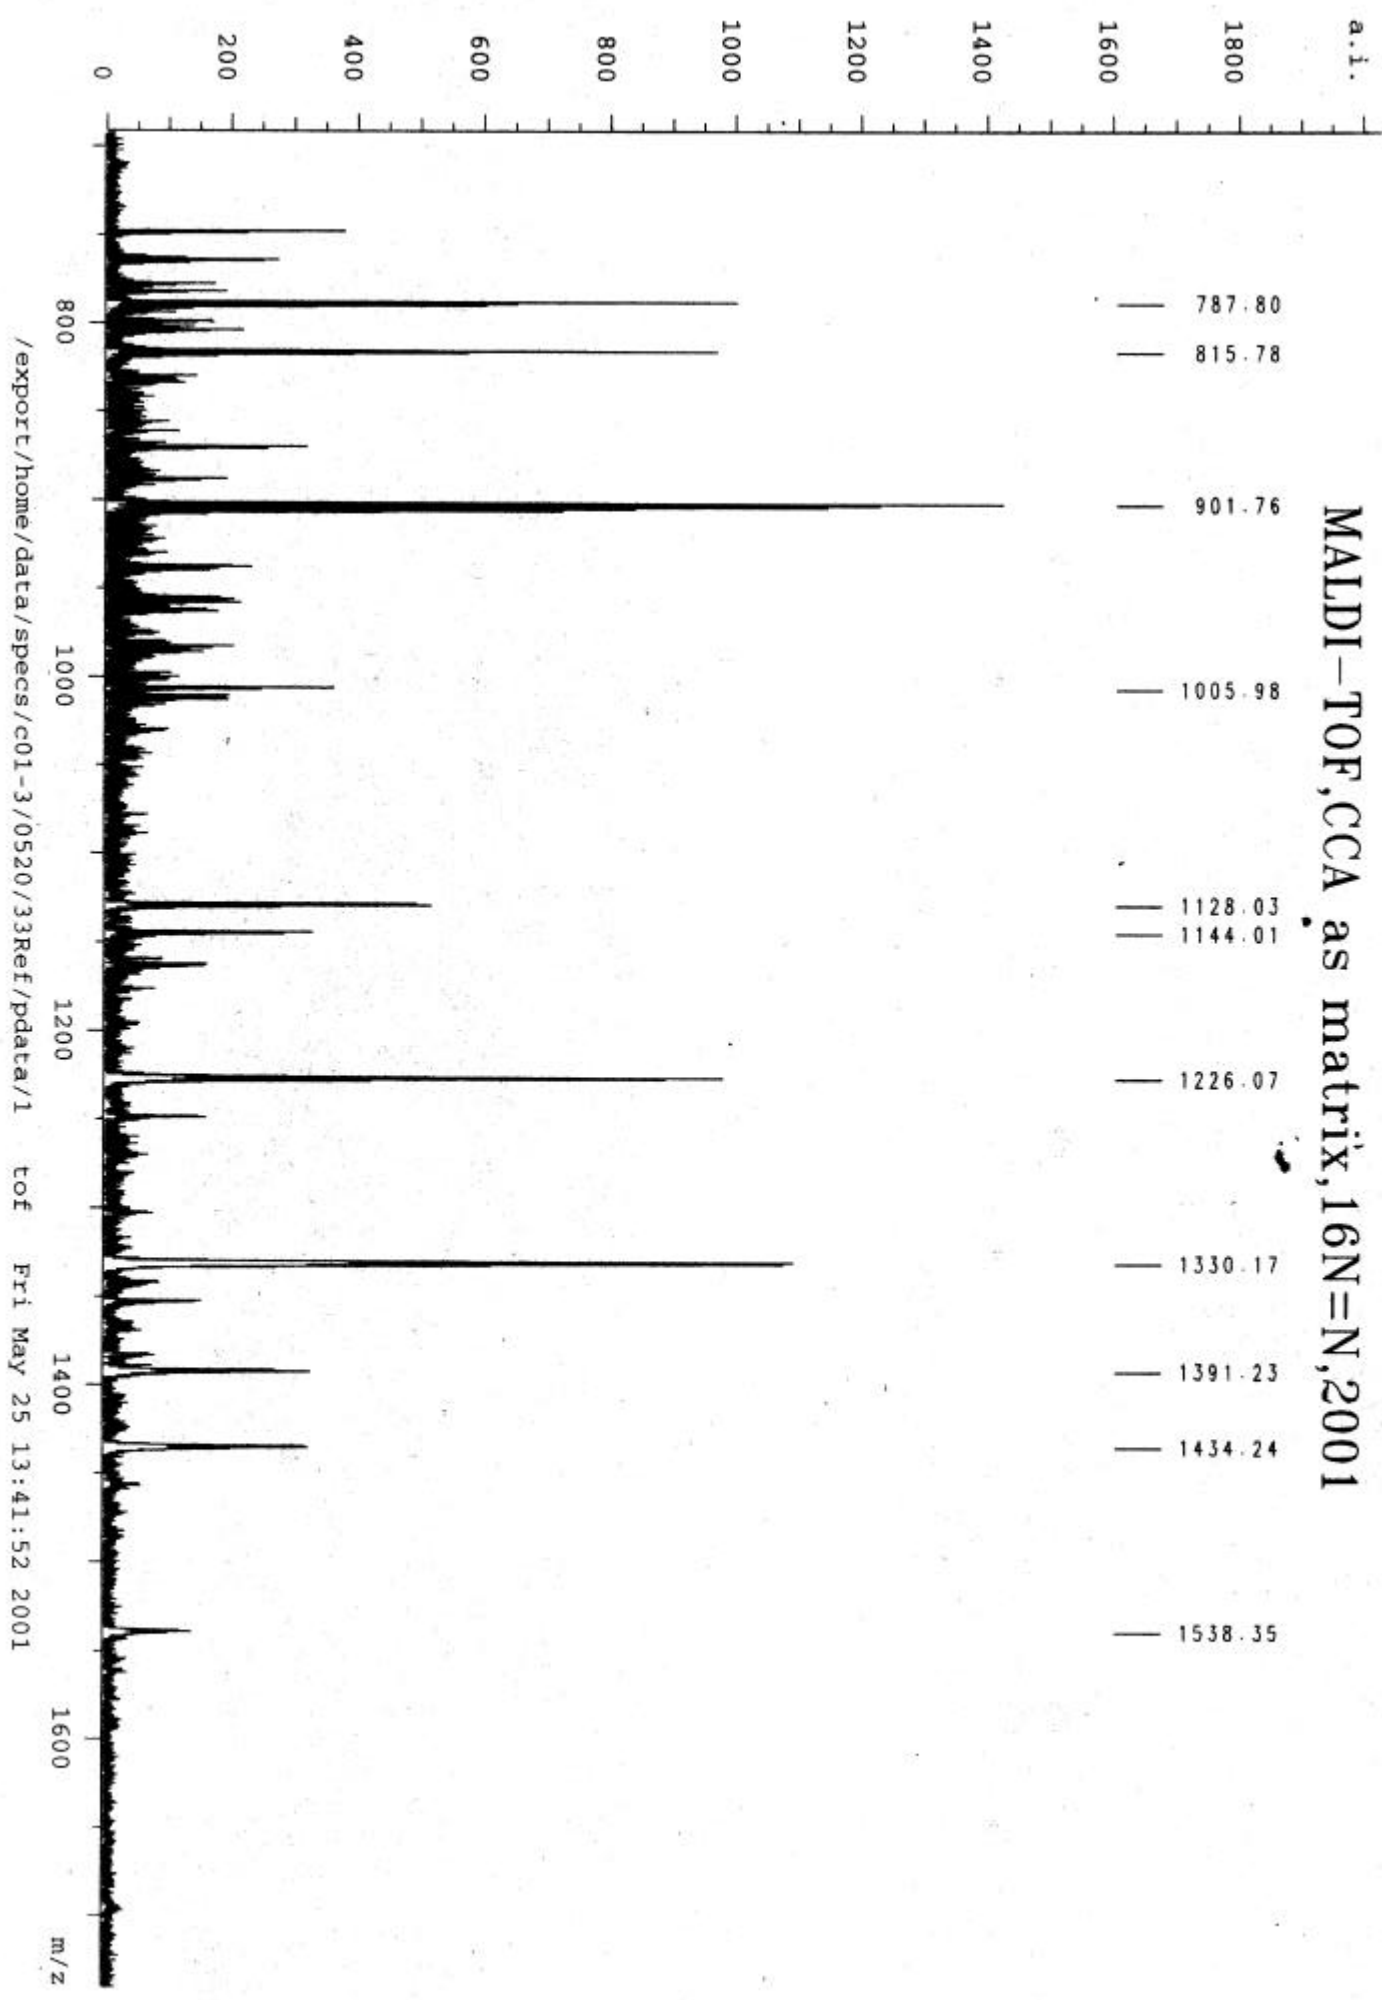

# IR spectrum of 4c

3/23/01

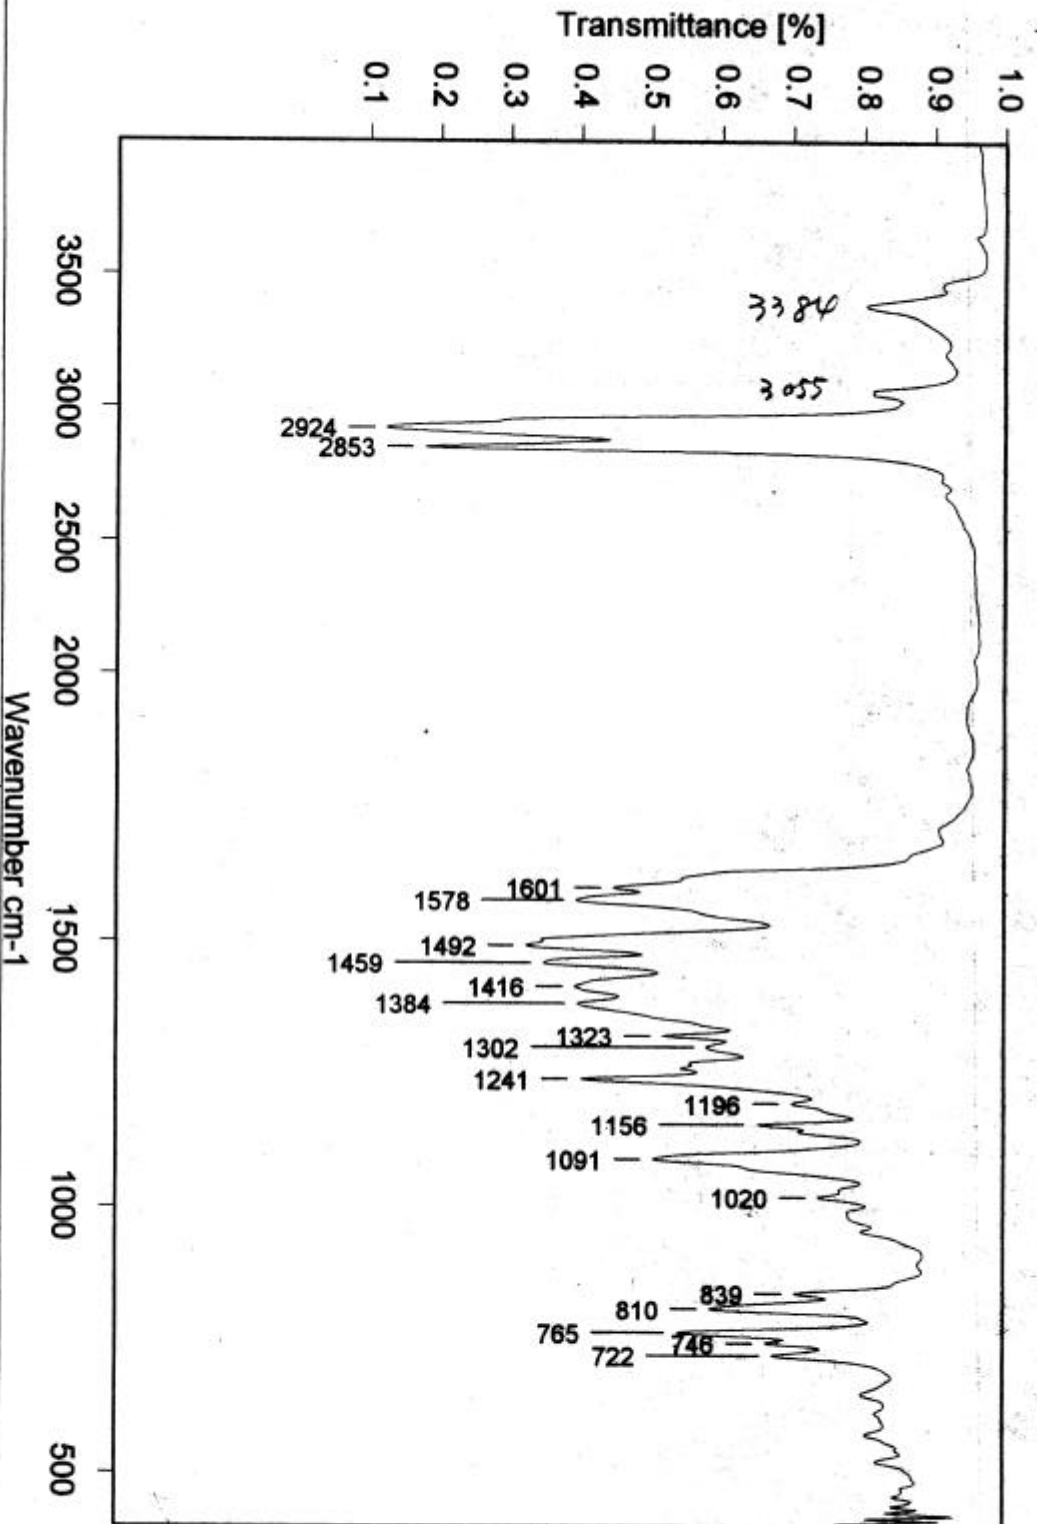

|                                |                              |
|--------------------------------|------------------------------|
| Path of File D:\data\test      | Filename ZQT14N=N.0          |
| Sample Name sample             | Sample Form sample form      |
| Date of Measurement 23/03/2001 | Time of Measurement 15:52:35 |
| Resolution 4                   | Signal Gain, Sample          |
| Number of Sample Scans 16      | Instrument Bruker EQUINOX55  |

# <sup>1</sup>H NMR of 4c

14N=N

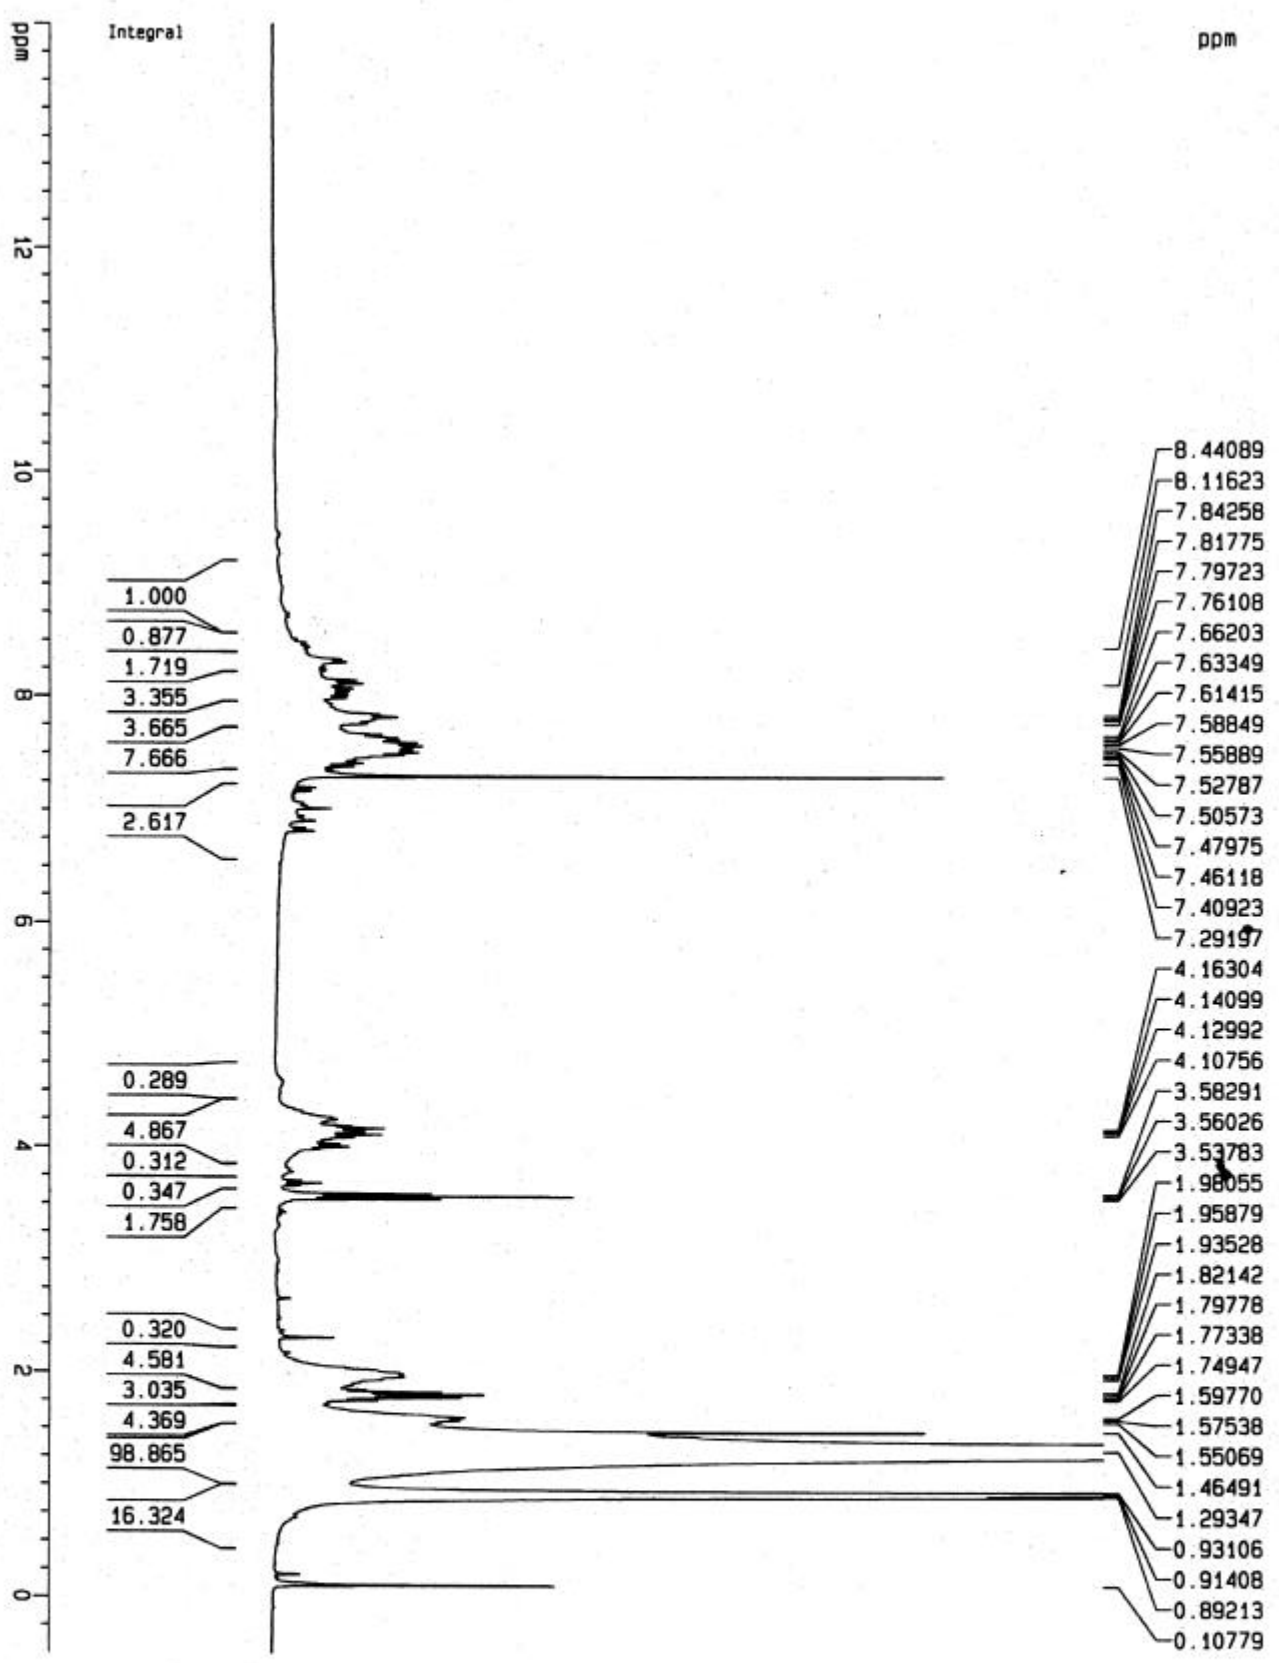

Current Data Parameters  
 NAME hou-1H  
 EXPNO 18  
 PROCNO 1

F2 - Acquisition Parameters  
 Date\_ 20010521  
 Time 9.27  
 INSTRUM dm300  
 PROBNM BBI

PULPROG zg  
 TD 12048  
 SOLVENT CDCl3  
 NS 8  
 DS 0  
 SMH 8992.806 Hz  
 FIDRES 0.746415 Hz  
 AQ 0.6699188 sec  
 RG 64  
 DM 55.600 usec  
 DE 4.50 usec  
 TE 300.0 K  
 D1 3.00000000 sec  
 P1 5.50 usec  
 SF01 300.1319571 MHz  
 NUC1 1H  
 PL1 0.00 dB

F2 - Processing parameters  
 SI 8192  
 SF 300.1299998 MHz  
 MDW GM  
 SSB 0  
 LB -0.30 Hz  
 GB 0.1  
 PC 0.10

1D NMR plot parameters  
 CX 21.50 cm  
 F1P 14.000 ppm  
 F1 4201.82 Hz  
 F2P -0.500 ppm  
 F2 -150.07 Hz  
 PPMCM 0.67442 ppm/cm  
 HZCM 202.41325 Hz/cm



# MS of 4c

MALDI-TOF, 14N=N, CCA, 2001, 4, 5

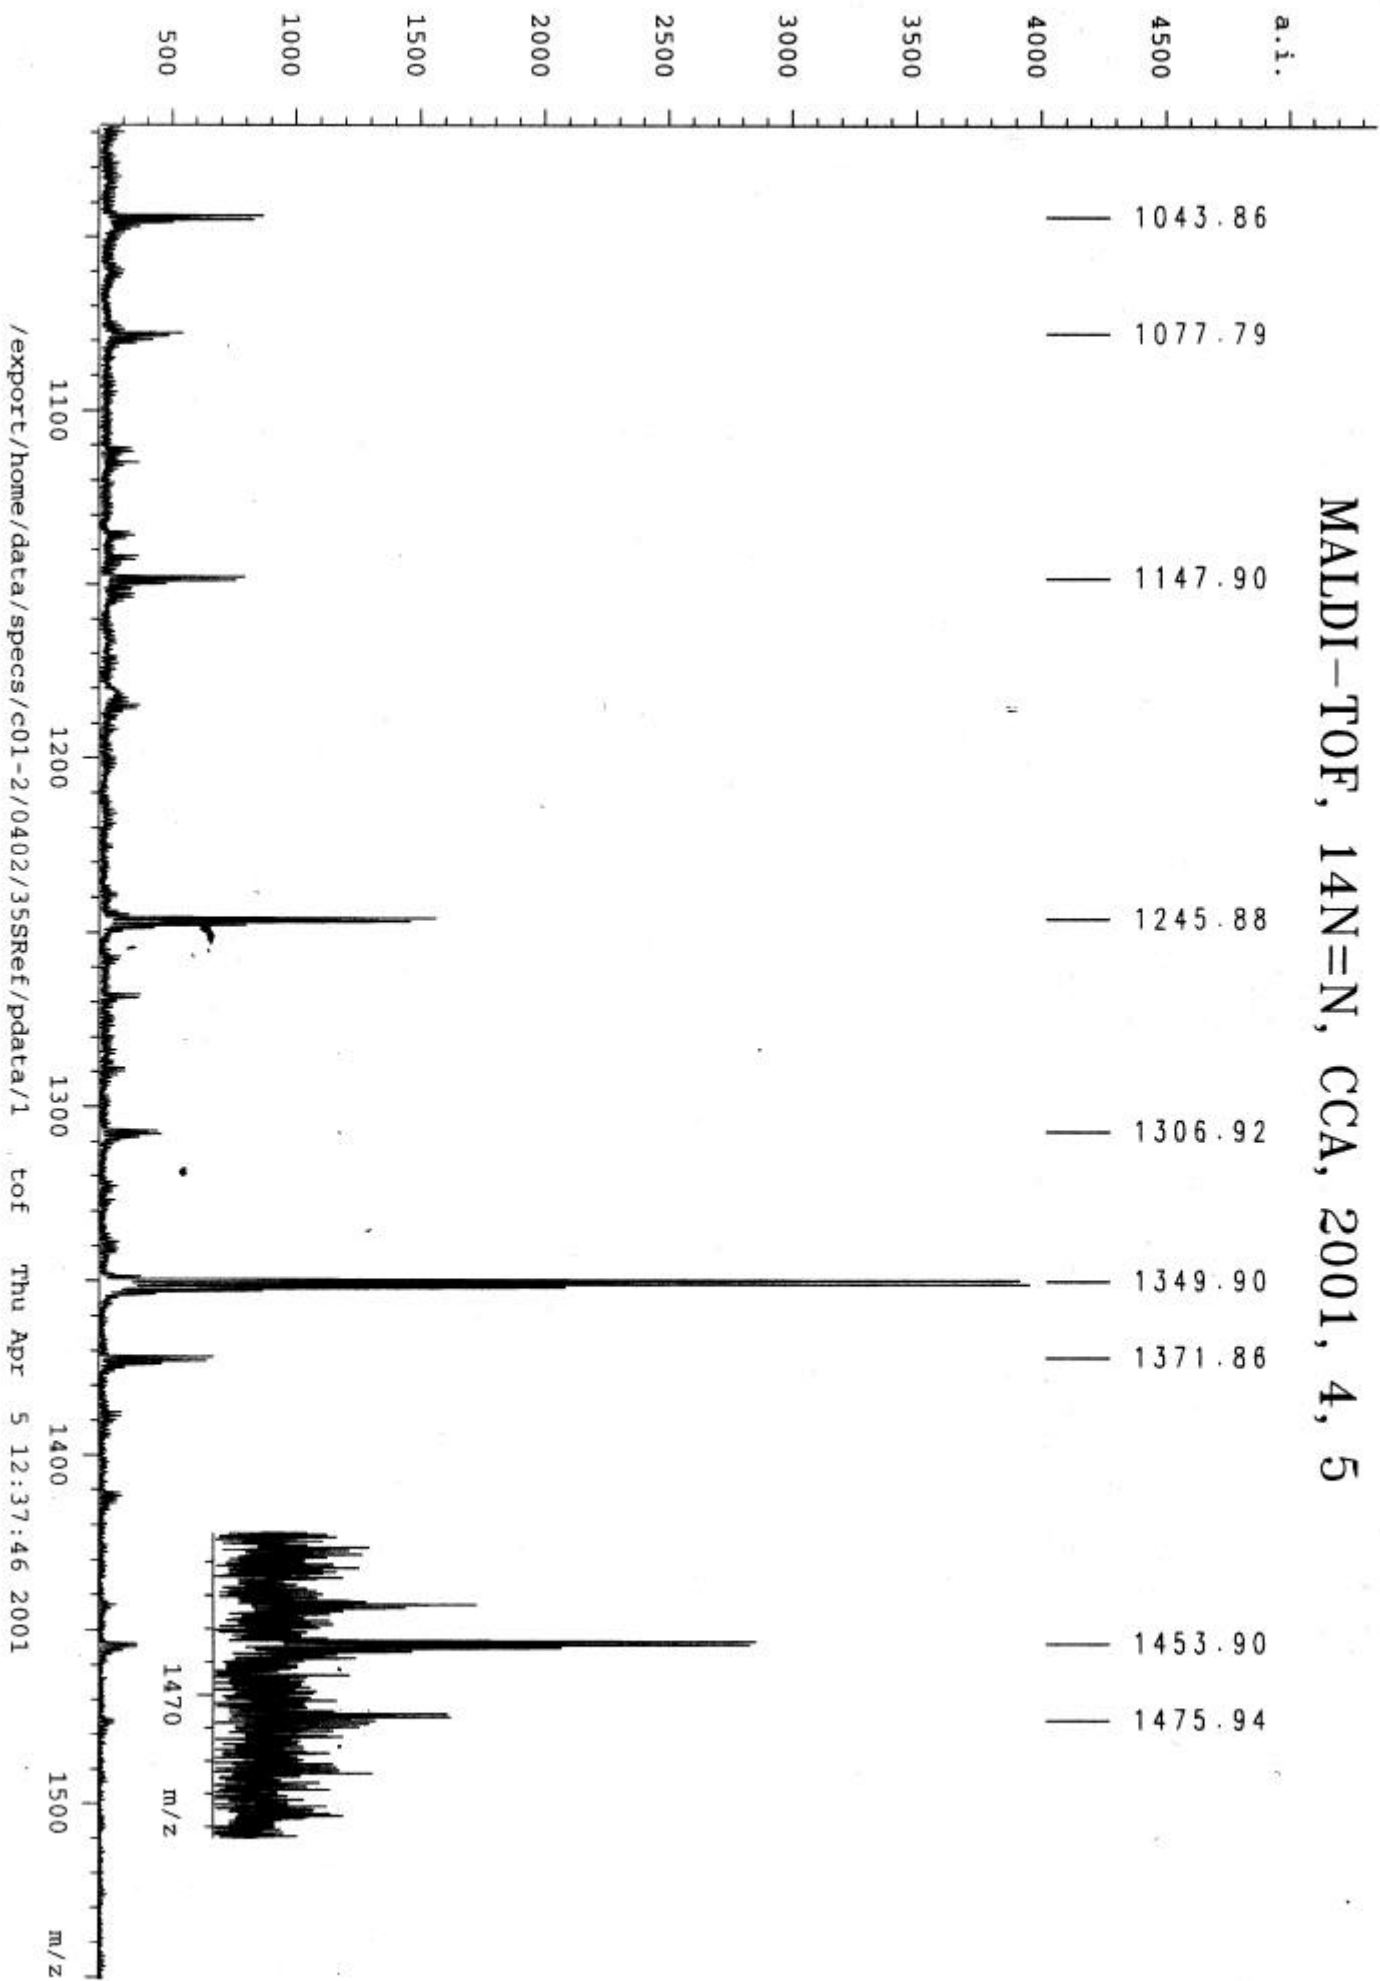

Supplement: b200043c3.pdf [file b200043c3.pdf]
