# Supplementary material for: STM observation of 1,3,5-triazines bearing rod-like benzeneazonaphthalene moieties monolayers self-assembled on graphite surfaceElectronic supplementary information (ESI) available: experimental details for the preparation of compounds 2–4, mass and IR spectra of 3a–c and 4a–c, and 1H NMR spectra of 4a–c. See http://www.rsc.org/suppdata/jm/b2/b200043c/
Source: Royal Society of Chemistry journal article supplement (doi:10.1039/b200043c), 2002-03-14
Supplement: b200043c2.pdf [file b200043c2.pdf]

中国科学院化学研究所质谱分析报告

MS of 3a

样品名称: C:\DATA\18NH2. 18

基峰: 515

基峰强度: 14850

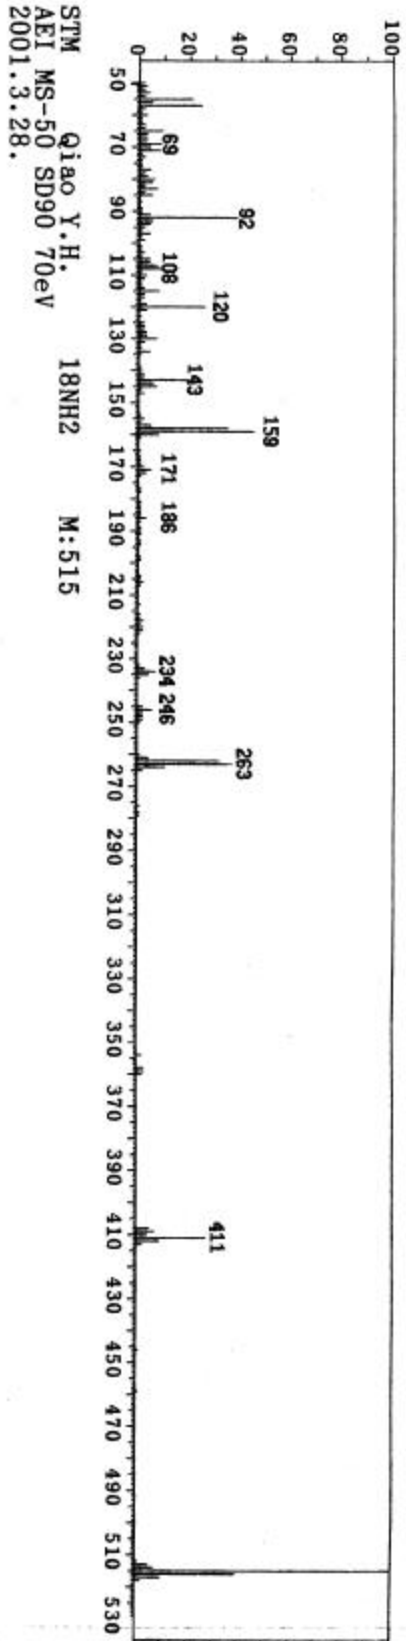

| mass | int% | mass | int% | mass | int% | mass | int%  |
|------|------|------|------|------|------|------|-------|
| 51   | 3.2  | 81   | 4.7  | 121  | 3.4  | 246  | 5.9   |
| 53   | 3.6  | 83   | 7.3  | 130  | 7.1  | 261  | 3.7   |
| 55   | 20.5 | 85   | 4.8  | 134  | 4.1  | 262  | 31.6  |
| 56   | 5.4  | 91   | 4.3  | 143  | 18.7 | 263  | 36.7  |
| 57   | 23.6 | 92   | 41.1 | 144  | 6.1  | 264  | 10.7  |
| 60   | 3.0  | 93   | 5.5  | 145  | 6.9  | 408  | 5.0   |
| 65   | 8.8  | 94   | 3.8  | 157  | 5.1  | 409  | 7.5   |
| 66   | 3.1  | 97   | 4.2  | 158  | 34.5 | 410  | 3.5   |
| 67   | 3.3  | 105  | 4.5  | 159  | 45.2 | 411  | 26.7  |
| 69   | 12.5 | 106  | 3.9  | 160  | 8.3  | 412  | 8.9   |
| 70   | 4.0  | 107  | 7.4  | 171  | 5.0  | 513  | 4.8   |
| 71   | 8.0  | 108  | 11.8 | 186  | 3.1  | 514  | 7.4   |
| 77   | 3.9  | 110  | 3.2  | 233  | 3.0  | 515  | 100.0 |
| 79   | 3.1  | 115  | 8.1  | 234  | 7.3  | 516  | 39.0  |
| 80   | 5.9  | 120  | 26.2 | 235  | 3.8  | 517  | 9.8   |

# IR spectrum of 3a

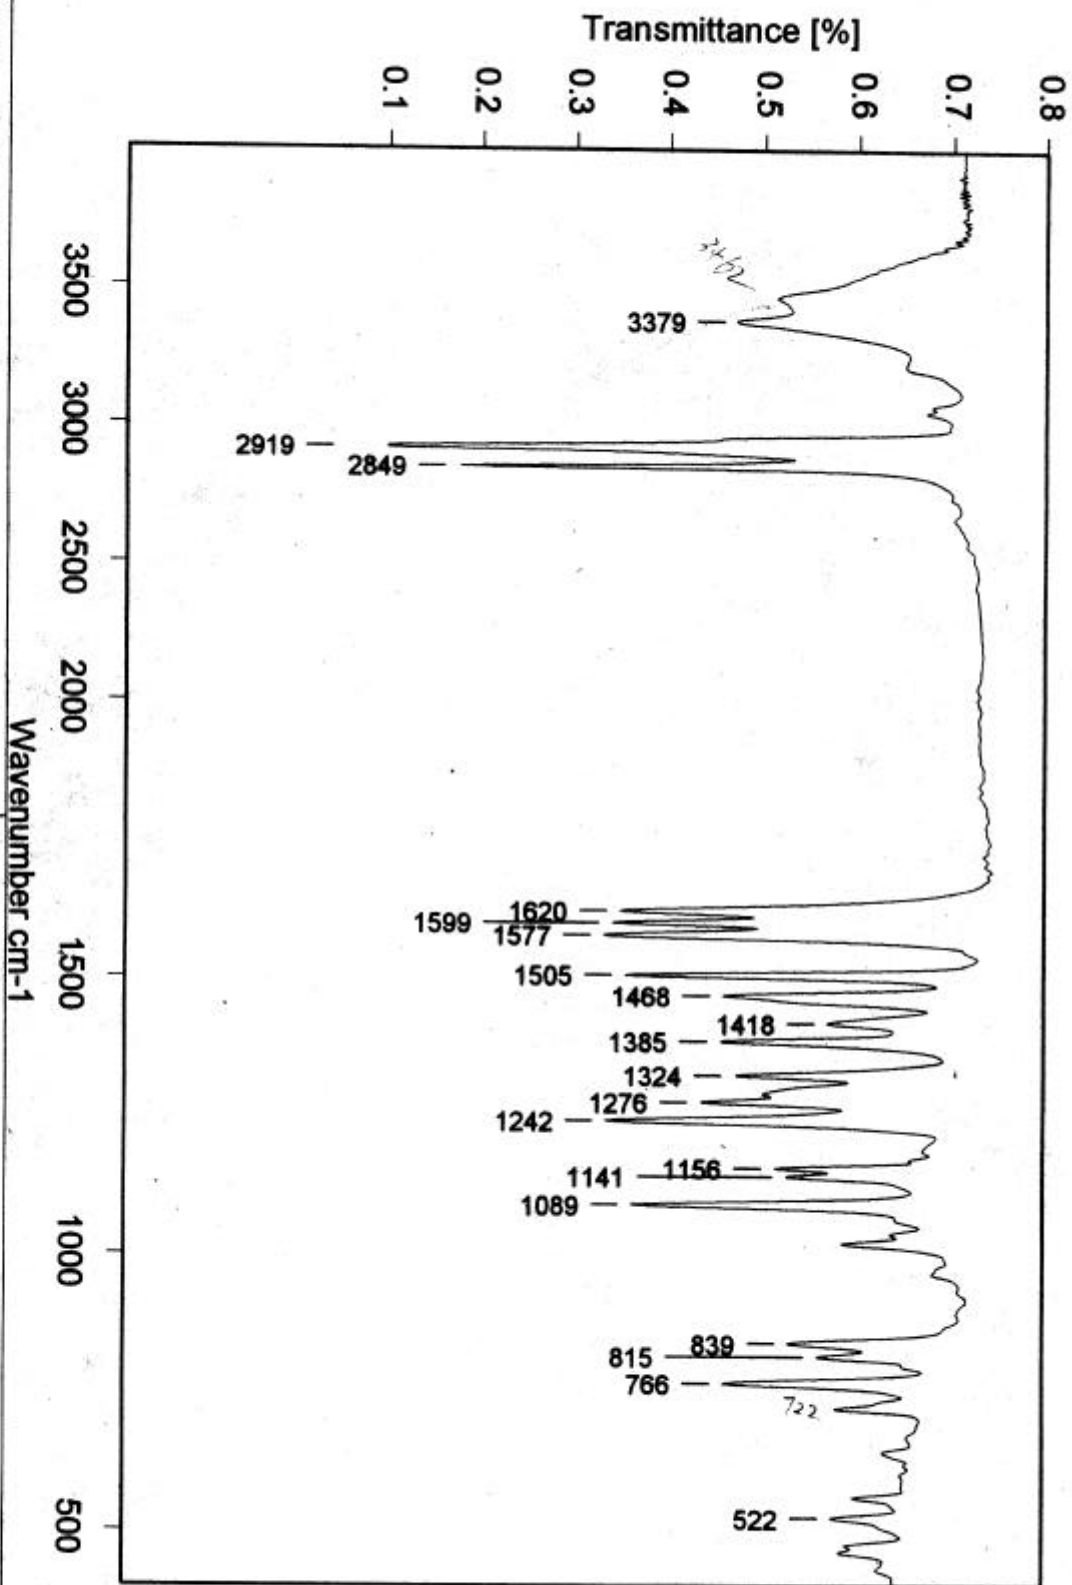

|                                |                              |
|--------------------------------|------------------------------|
| Path of File D:\data\test      | Filename 18NH2.0             |
| Sample Name sample             | Sample Form sample form      |
| Date of Measurement 26/03/2001 | Time of Measurement 11:19:19 |
| Resolution 4                   | Signal Gain, Sample          |
| Number of Sample Scans 16      | Instrument Bruker EQUINOX55  |

# 中国科学院化学研究所质谱分析报告

## MS of 3b

样品名称: C:\DATA\C16NH2. 15

基峰: 487

基峰强度: 24272

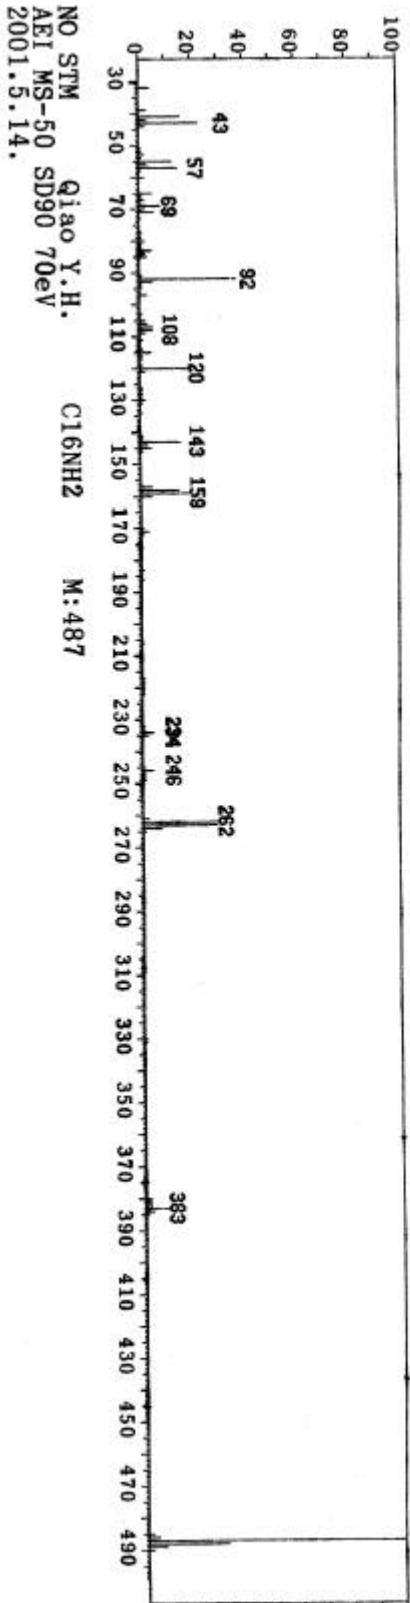

| mass | int% | mass | int% | mass | int% | mass | int%  |
|------|------|------|------|------|------|------|-------|
| 32   | 4.4  | 85   | 2.6  | 145  | 4.5  | 380  | 2.1   |
| 39   | 3.3  | 92   | 37.2 | 157  | 4.2  | 381  | 2.5   |
| 41   | 15.9 | 93   | 4.8  | 158  | 14.8 | 382  | 2.2   |
| 42   | 3.1  | 97   | 2.8  | 159  | 21.1 | 383  | 12.6  |
| 43   | 23.2 | 105  | 2.0  | 160  | 3.6  | 384  | 2.9   |
| 44   | 2.2  | 106  | 2.8  | 171  | 2.9  | 485  | 2.3   |
| 45   | 13.4 | 107  | 4.6  | 234  | 4.2  | 486  | 4.4   |
| 55   | 3.4  | 108  | 5.2  | 235  | 2.4  | 487  | 100.0 |
| 56   | 15.5 | 115  | 3.5  | 246  | 4.1  | 488  | 31.2  |
| 57   | 4.9  | 120  | 22.6 | 261  | 2.1  | 489  | 6.7   |
| 65   | 8.8  | 130  | 2.4  | 262  | 28.9 | 490  | 2.2   |
| 69   | 5.7  | 143  | 16.0 | 263  | 28.7 |      |       |
| 71   | 4.7  | 144  | 3.2  | 264  | 7.5  |      |       |
| 83   |      |      |      |      |      |      |       |

# IR spectrum of 3b

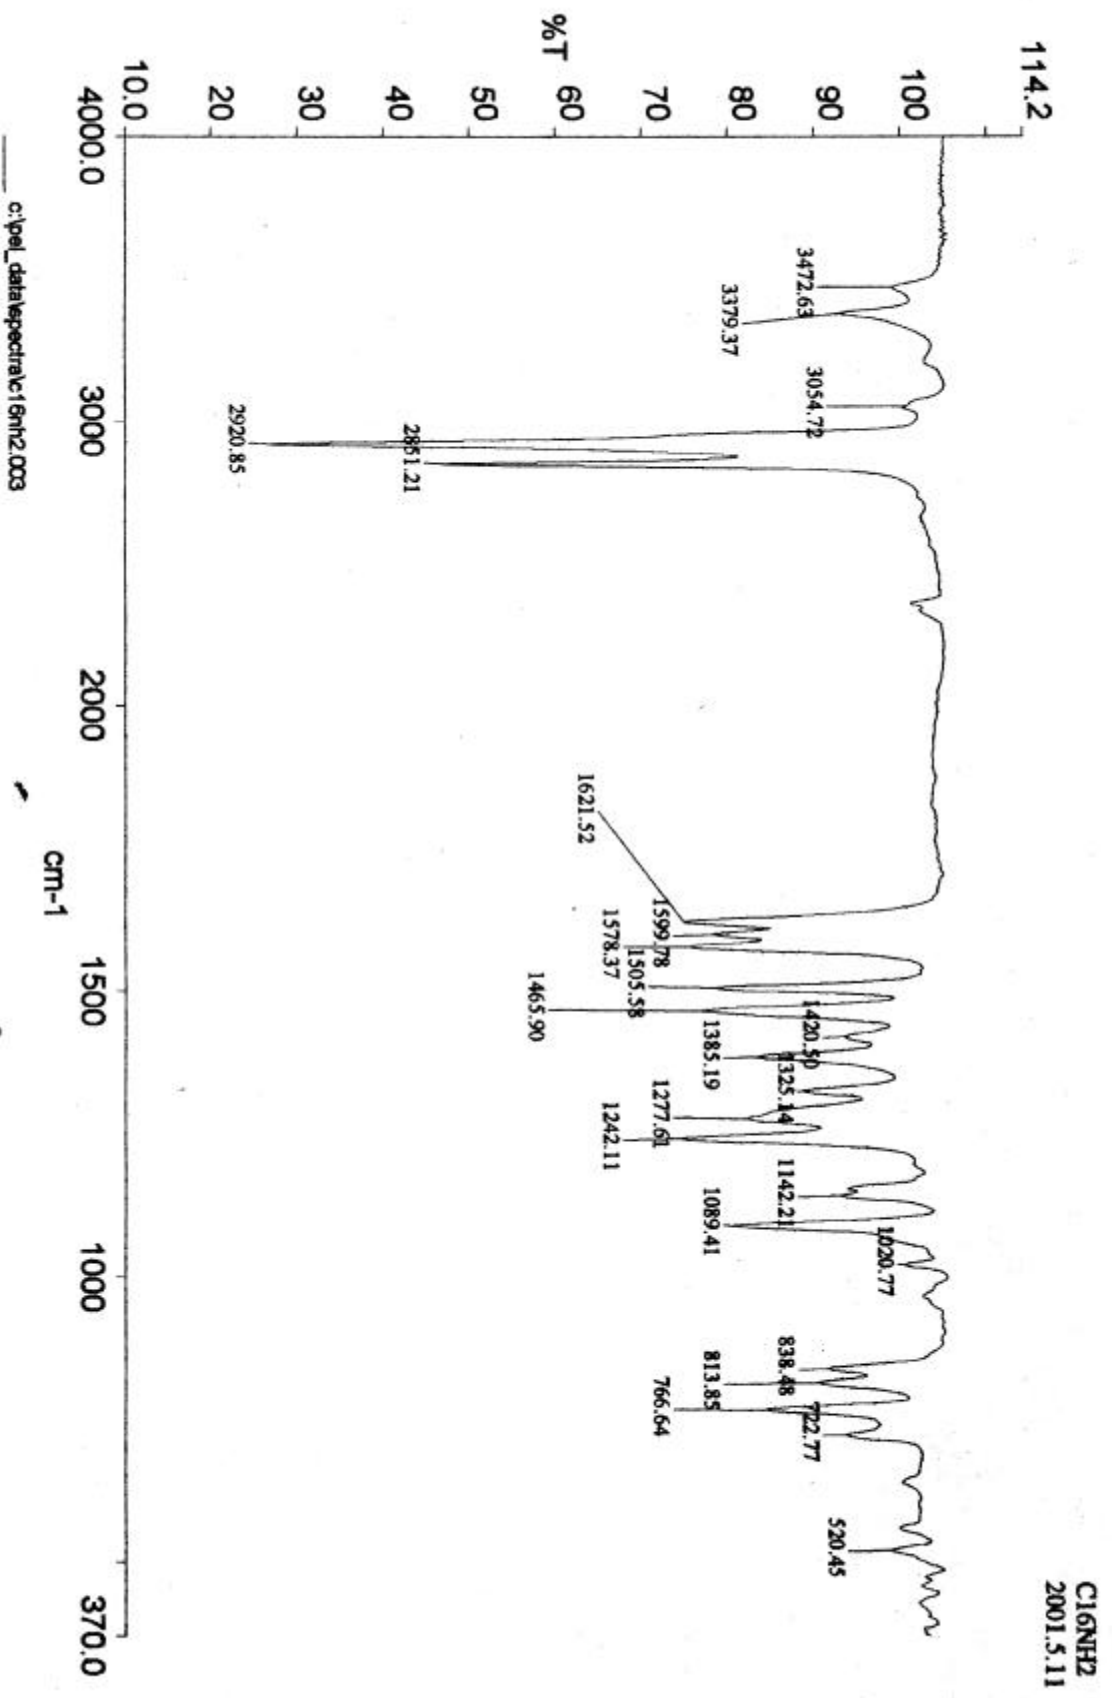

# MS of 3c

## 中国科学院化学研究所质谱分析报告

样品名称: C:\DATA\14NH2.17

基峰: 459

基峰强度: 21740

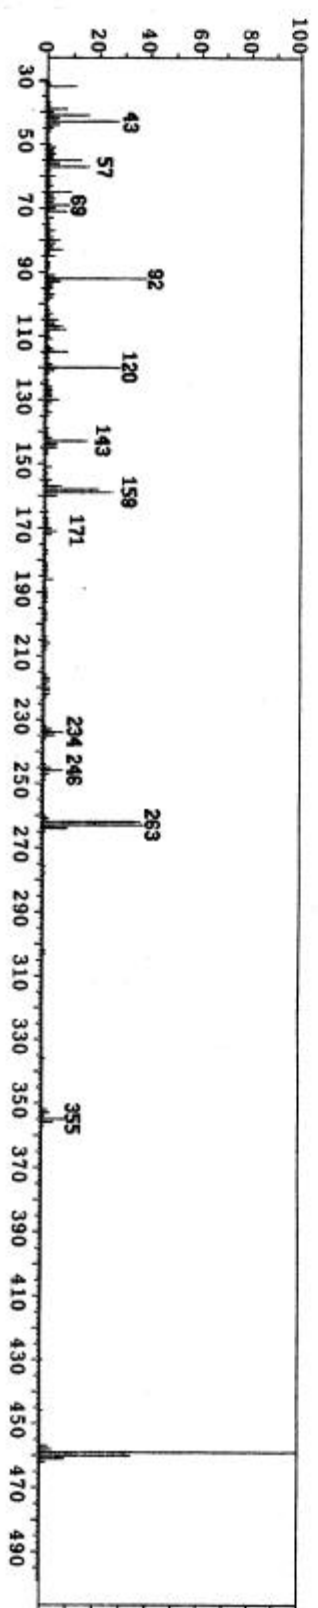

STM Qiao Y.H.  
AEI MS-50 SD90 70eV  
2001.3.28.  
14NH2 M:459

| mass | int% | mass | int% | mass | int% | mass | int%  |
|------|------|------|------|------|------|------|-------|
| 32   | 11.0 | 77   | 3.1  | 120  | 28.0 | 235  | 4.5   |
| 39   | 6.9  | 80   | 4.8  | 130  | 5.4  | 245  | 3.2   |
| 41   | 16.2 | 83   | 6.3  | 143  | 15.8 | 246  | 6.6   |
| 42   | 3.8  | 91   | 3.0  | 144  | 4.0  | 262  | 37.1  |
| 43   | 27.5 | 92   | 39.9 | 145  | 4.5  | 263  | 42.3  |
| 44   | 3.8  | 93   | 5.5  | 157  | 5.6  | 264  | 9.0   |
| 55   | 12.9 | 97   | 3.4  | 158  | 19.9 | 355  | 11.4  |
| 56   | 4.1  | 105  | 4.1  | 159  | 26.2 | 356  | 3.8   |
| 57   | 15.6 | 106  | 3.2  | 160  | 3.7  | 458  | 4.5   |
| 65   | 8.8  | 107  | 5.6  | 171  | 3.5  | 459  | 100.0 |
| 69   | 10.8 | 108  | 7.1  | 233  | 3.4  | 460  | 33.9  |
| 71   | 6.5  | 115  | 7.8  | 234  | 7.5  | 461  | 9.4   |

# IR spectrum of 3c

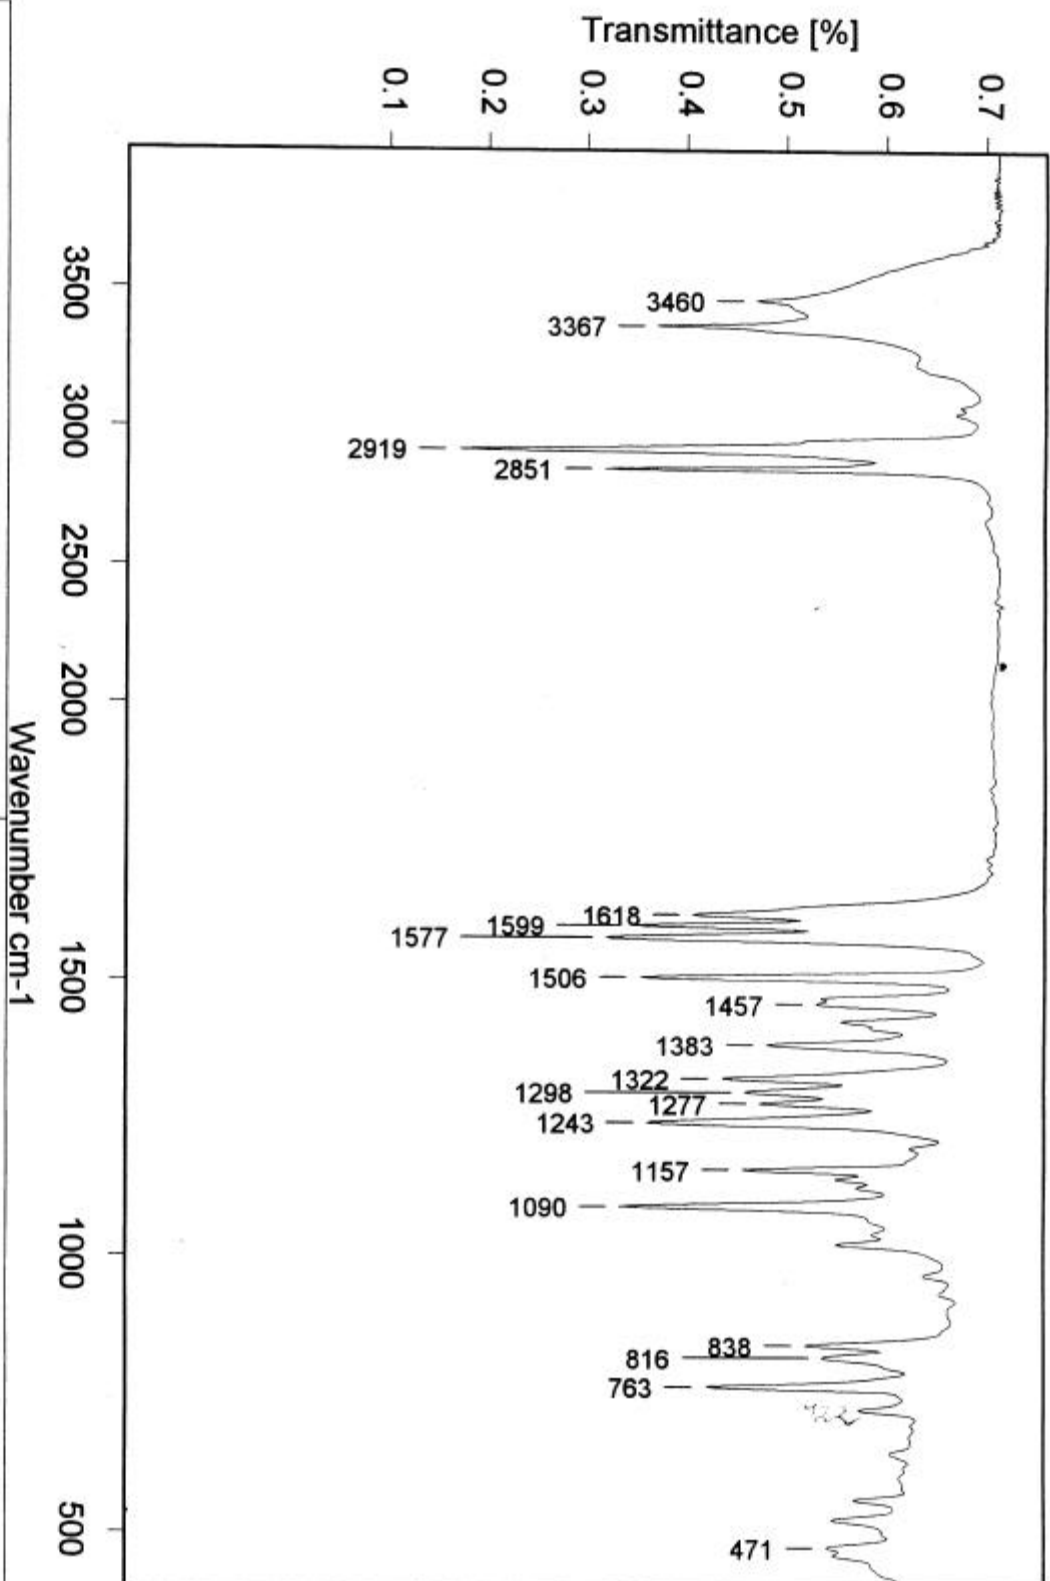

|                                |                              |
|--------------------------------|------------------------------|
| Path of File D:\data\test      | Filename 14NH2.0             |
| Sample Name sample             | Sample Form sample form      |
| Date of Measurement 26/03/2001 | Time of Measurement 11:26:02 |
| Resolution 4                   | Signal Gain, Sample          |
| Number of Sample Scans 16      | Instrument Bruker EQUINOX55  |
